# Supplementary material for: Antibacterial and Angiogenic Poly(ionic liquid) Hydrogels
Source: MDPI journal article supplement (doi:10.3390/gels8080476), 2022-07-28
Supplement: s1 [file s1]

Supplementary

# Antibacterial and Angiogenic Poly(Ionic Liquid) Hydrogels

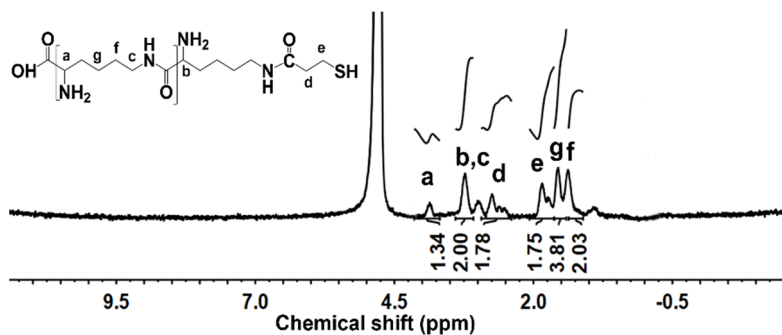

Figure S1.  $^1\text{H}$  NMR (500 MHz,  $\text{D}_2\text{O}$ ) of EPL-SH.

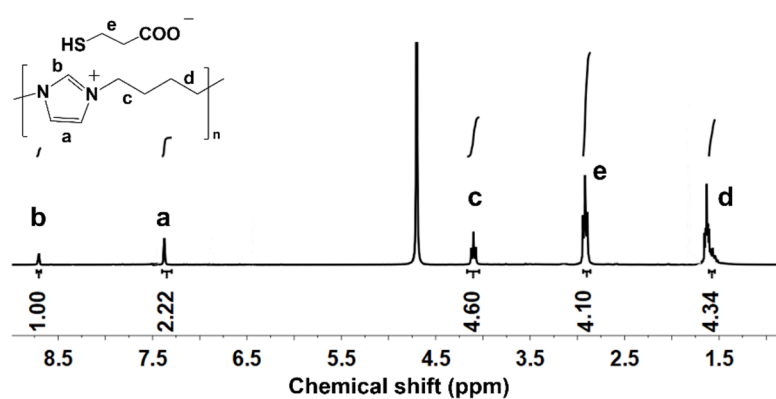

Figure S2.  $^1\text{H}$  NMR (500 MHz,  $\text{D}_2\text{O}$ ) of Imidazole-SH.

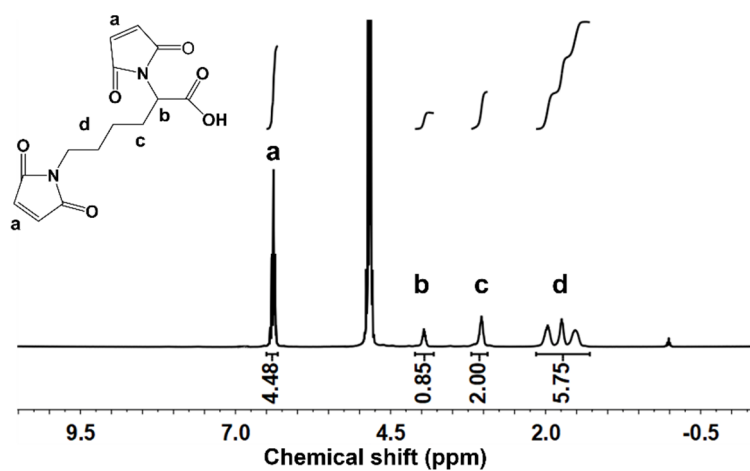

Figure S3.  $^1\text{H}$  NMR (500 MHz,  $\text{D}_2\text{O}$ ) of MAH-Lys.

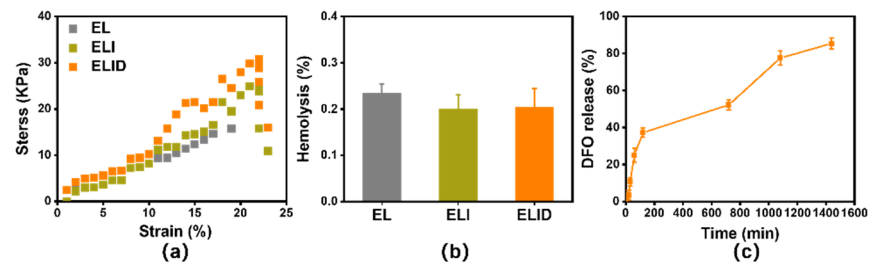

**Figure S4.** (a) Stress–strain curve of hydrogels; (b) hemolysis of hydrogels; (c) DFO release curve.
